# Supplementary material for: Association of Prolonged Fluoroscopy Time with Procedural Success of Percutaneous Coronary Intervention for Stable Coronary Artery Disease with and without Chronic Total Occlusion
Source: PubMed Central journal article supplement (PMC8038393; doi:10.3390/jcm10071486), 2021-04-03
Supplement: jcm-10-01486-s001.pdf [file jcm-10-01486-s001.pdf]

## Supplement

**Supplementary Figure 1.** Receiver operating characteristic (ROC) curve analysis of fluoroscopy time (minutes) and procedural success of performed percutaneous coronary interventions overall (**Panel A**), non-CTO PCI (**Panel B**) and CTO PCI (**Panel C**).

AUC, area under the curve, CTO, chronic total occlusion; PCI, percutaneous coronary intervention.

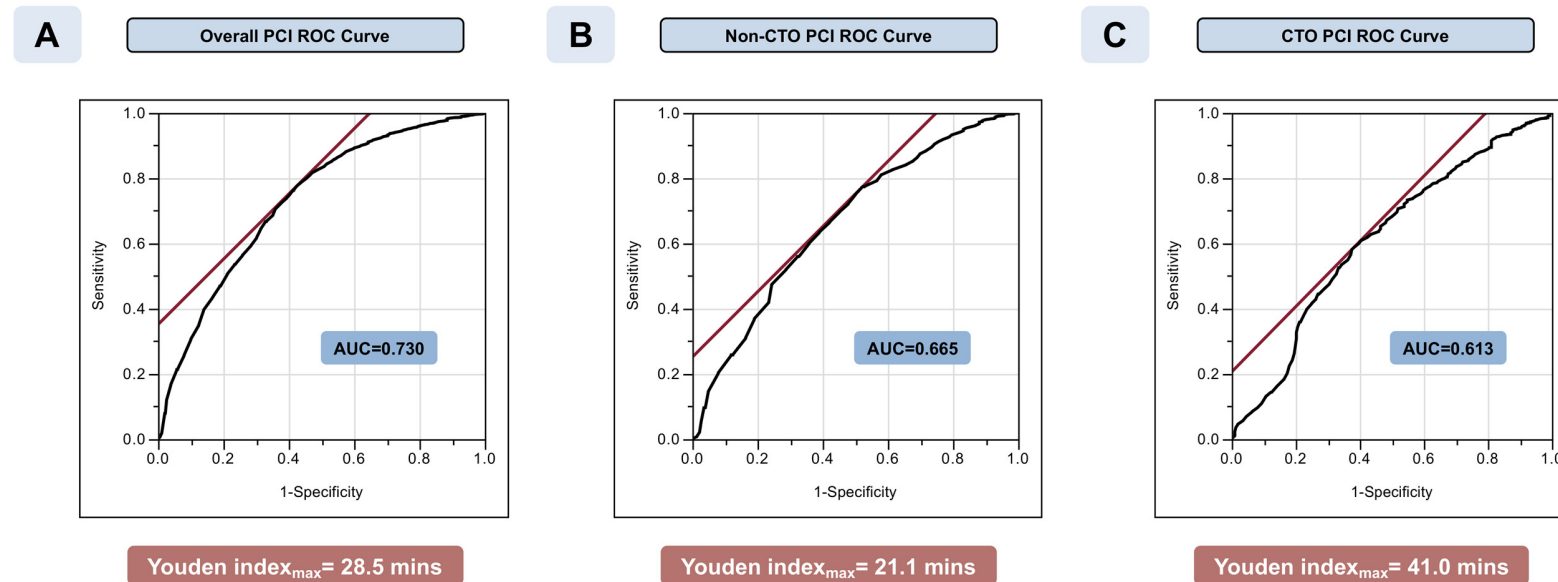

**Supplementary Table 1.** Sensitivity logistic regression between chronic occlusive (CTO) percutaneous coronary intervention (PCI), fluoroscopy time (both as independent variables) and procedural failure (as dependent variable) by applying the Society of Cardiovascular Angiography and Interventions (SCAI) myocardial infarction (MI) definition.

| Variable                          | Procedural failure<br>(SCAI MI) |           |         |
|-----------------------------------|---------------------------------|-----------|---------|
|                                   | OR                              | CI 95%    | P value |
| CTO PCI (vs. non-CTO PCI)         | 2.16                            | 1.81-2.58 | <0.001  |
| Fluoroscopy time (mins)           | 1.03                            | 1.02-1.03 | <0.001  |
| CTO PCI * Fluoroscopy time (mins) | -                               | -         | <0.001  |

**Supplementary Table 2.** Baseline characteristics of chronic occlusive (CTO) and non-occlusive (non-CTO) percutaneous coronary intervention (PCI) with and without procedural success.

| Variable                           | CTO PCI          |                 | P value          | Non-CTO PCI      |                 | P value      |
|------------------------------------|------------------|-----------------|------------------|------------------|-----------------|--------------|
|                                    | Success (n=2408) | Failure (n=312) |                  | Success (n=9592) | Failure (n=226) |              |
| Age (years)                        | 67.9 ± 10.0      | 65.2 ± 10.4     | <b>&lt;0.001</b> | 70.3 ± 10.1      | 72.1 ± 10.1     | <b>0.010</b> |
| Men                                | 83.7%            | 83.7%           | 0.991            | 75.6%            | 69.0%           | <b>0.024</b> |
| BMI (kg/m <sup>2</sup> )           | 28.6 ± 4.6       | 28.1 ± 4.6      | 0.081            | 27.9 ± 4.5       | 27.5 ± 4.8      | 0.212        |
| Diabetes Mellitus                  | 28.5%            | 33.8%           | 0.064            | 29.7%            | 37.6%           | <b>0.015</b> |
| Hypercholesterinemia               | 90.5%            | 92.0%           | 0.402            | 87.8%            | 89.0%           | 0.612        |
| Hypertension                       | 85.9%            | 88.7%           | 0.173            | 86.9%            | 89.4%           | 0.284        |
| Smoking (current)                  | 20.0%            | 17.5%           | 0.313            | 13.1%            | 13.5%           | 0.865        |
| Left Ventricular Ejection Fraction |                  |                 | 0.519            |                  |                 | <b>0.050</b> |
| • Normal                           | 65.6%            | 64.4%           |                  | 73.7%            | 69.7%           |              |
| • Moderately reduced               | 19.6%            | 22.9%           |                  | 15.0%            | 13.1%           |              |
| • Reduced                          | 10.2%            | 8.5%            |                  | 6.8%             | 9.1%            |              |
| • Low                              | 4.7%             | 4.2%            |                  | 4.5%             | 8.1%            |              |
| Family History of CAD              | 45.3%            | 37.8%           | <b>0.022</b>     | 40.5%            | 37.2%           | 0.367        |
| Heart Failure                      | 4.3%             | 4.3%            | 0.969            | 4.0%             | 7.4%            | <b>0.017</b> |
| NYHA Classification                |                  |                 | 0.403            |                  |                 | <b>0.040</b> |
| • I                                | 18.7%            | 20.8%           |                  | 16.8%            | 12.5%           |              |
| • II                               | 50.3%            | 46.3%           |                  | 47.1%            | 41.7%           |              |

|                                  |                   |                   |              |                   |                   |              |
|----------------------------------|-------------------|-------------------|--------------|-------------------|-------------------|--------------|
| • III                            | 28.7%             | 31.7%             |              | 32.1%             | 40.5%             |              |
| • IV                             | 2.3%              | 1.3%              |              | 3.1%              | 5.4%              |              |
| Prior Myocardial Infarction      | 38.3%             | 41.0%             | 0.381        | 27.1%             | 25.5%             | 0.620        |
| Prior CABG                       | 18.1%             | 24.0%             | <b>0.014</b> | 13.0%             | 19.3%             | <b>0.008</b> |
| eGFR (ml/min/1.73 <sup>2</sup> ) | 74.7 ± 19.2       | 71.0 ± 20.1       | <b>0.002</b> | 70.5 ± 19.4       | 67.2 ± 21.9       | <b>0.028</b> |
| Baseline Creatinine (mg/dL)      | 1.00 (0.89, 1.17) | 1.02 (0.90, 1.20) | 0.182        | 1.00 (0.88, 1.20) | 1.00 (0.82, 1.26) | 0.556        |

\* Pericardial tamponade requiring either pericardiocentesis or surgical evacuation.

† Composite of all-cause death, myocardial infarction, stroke, target vessel-, and lesion revascularization.

MACCE, major adverse cardiac and cerebrovascular event; TLR, target lesion revascularization; TVR, target vessel revascularization.

**Supplementary Table 3.** Angiographic characteristics of chronic occlusive (CTO) and non-occlusive (non-CTO) percutaneous coronary intervention (PCI) with and without procedural success.

| Variable             | CTO PCI          |                 | P value          | Non-CTO PCI       |                 | P value          |
|----------------------|------------------|-----------------|------------------|-------------------|-----------------|------------------|
|                      | Success (n=2489) | Failure (n=327) |                  | Success (n=13719) | Failure (n=321) |                  |
| Target vessel        |                  |                 | <b>0.039</b>     |                   |                 | 0.270            |
| • RCA                | 49.9%            | 41.0%           |                  | 23.6%             | 23.7%           |                  |
| • LAD                | 25.0%            | 26.3%           |                  | 28.6%             | 32.7%           |                  |
| • LM                 | 1.0%             | 1.2%            |                  | 7.6%              | 9.4%            |                  |
| • CX                 | 23.5%            | 30.6%           |                  | 38.1%             | 32.7%           |                  |
| • Arterial Graft     | 0.0%             | -               |                  | 0.2%              | -               |                  |
| • Venous Graft       | 0.6%             | 0.9%            |                  | 2.0%              | 1.6%            |                  |
| Lesion Length        |                  |                 | 0.051            |                   |                 | 0.101            |
| • <10 mm             | 1.8%             | 3.6%            |                  | 17.8%             | 18.2%           |                  |
| • 10-20 mm           | 18.0%            | 20.3%           |                  | 33.0%             | 38.4%           |                  |
| • >20 mm             | 80.3%            | 76.1%           |                  | 49.1%             | 43.4%           |                  |
| Relevant side-branch | 30.0%            | 26.0%           | 0.144            | 33.1%             | 31.8%           | 0.639            |
| Calcification        |                  |                 | <b>&lt;0.001</b> |                   |                 | <b>&lt;0.001</b> |
| • None               | 6.5%             | 3.7%            |                  | 7.5%              | 3.8%            |                  |
| • Mild (spots)       | 28.7%            | 15.8%           |                  | 50.1%             | 36.7%           |                  |
| • Moderate           | 27.9%            | 22.7%           |                  | 27.1%             | 27.9%           |                  |
| • Severe             | 36.9%            | 57.8%           |                  | 15.3%             | 31.7%           |                  |

|                            |       |       |                  |       |       |                  |
|----------------------------|-------|-------|------------------|-------|-------|------------------|
| Proximal Vessel Tortuosity | 19.9% | 30.1% | <b>&lt;0.001</b> | 16.5% | 27.4% | <b>&lt;0.001</b> |
| Intra-lesion Angulation    |       |       | <b>0.006</b>     |       |       | <b>&lt;0.001</b> |
| • None                     | 12.1% | 10.9% |                  | 11.2% | 10.5% |                  |
| • Discrete (<45)           | 36.7% | 28.8% |                  | 49.7% | 40.5% |                  |
| • Moderate (45-90)         | 44.7% | 50.3% |                  | 35.2% | 38.5% |                  |
| • Severe (>90)             | 6.5%  | 10.0% |                  | 3.9%  | 10.5% |                  |
| Multiple Target Vessels    | 31.1% | 35.5% | 0.106            | 49.3% | 53.3% | 0.162            |
| In-stent Restenosis        | 12.1% | 10.8% | 0.511            | 12.9% | 10.4% | 0.196            |
| AHA/ACC Lesion Class       |       |       | -                |       |       | <b>&lt;0.001</b> |
| • Type A                   | -     | -     |                  | 5.2%  | 1.9%  |                  |
| • Type B1                  | -     | -     |                  | 27.1% | 18.3% |                  |
| • Type B2                  | -     | -     |                  | 39.1% | 37.5% |                  |
| • Type C                   | -     | -     |                  | 28.5% | 42.3% |                  |

\* Pericardial tamponade requiring either pericardiocentesis or surgical evacuation.

† Composite of all-cause death, myocardial infarction, stroke, target vessel-, and lesion revascularization.

ACC, American College of Cardiology; AHA, American Heart Association; CTO, chronic total occlusion; CX, circumflex artery, LAD, left anterior descending artery; LM, left main artery; RCA, right coronary artery.

**Supplementary Table 4.** In-hospital and long-term complications categorized according to non-occlusive percutaneous coronary intervention (non-CTO PCI) fluoroscopy time quartiles.

| <b>Variable</b>              | <b>Overall<br/>(n=9818)</b> | <b>1st Quartile<br/>(n=2510)</b> | <b>2nd Quartile<br/>(n=2548)</b> | <b>3rd Quartile<br/>(n=2487)</b> | <b>4th Quartile<br/>(n=2273)</b> | <b>P value</b>   |
|------------------------------|-----------------------------|----------------------------------|----------------------------------|----------------------------------|----------------------------------|------------------|
| Procedural success           | 97.7%                       | 98.9%                            | 98.6%                            | 97.8%                            | 95.3%                            | <b>&lt;0.001</b> |
| Technical success            | 99.3%                       | 99.7%                            | 99.6%                            | 99.4%                            | 99.3%                            | <b>&lt;0.001</b> |
| Major complications *        | 1.78%                       | 0.88%                            | 1.26%                            | 1.62%                            | 3.56%                            | <b>&lt;0.001</b> |
| In-hospital MACCE            | 1.61%                       | 0.80%                            | 1.18%                            | 1.45%                            | 3.17%                            | <b>&lt;0.001</b> |
| • Death                      | 0.42%                       | 0.20%                            | 0.27%                            | 0.28%                            | 0.97%                            | <b>&lt;0.001</b> |
| • MI                         | 0.68%                       | 0.40%                            | 0.39%                            | 0.60%                            | 1.41%                            | <b>&lt;0.001</b> |
| • Stroke                     | 0.17%                       | 0.04%                            | 0.16%                            | 0.16%                            | 0.35%                            | 0.077            |
| • TVR                        | 1.17%                       | 0.60%                            | 0.71%                            | 1.09%                            | 2.42%                            | <b>&lt;0.001</b> |
| • TLR                        | 1.07%                       | 0.48%                            | 0.59%                            | 1.01%                            | 2.33%                            | <b>&lt;0.001</b> |
| Perforation                  | 0.64%                       | 0.12%                            | 0.32%                            | 0.61%                            | 0.64%                            | <b>&lt;0.001</b> |
| Pericardial Tamponade †      | 0.21%                       | 0.08%                            | 0.08%                            | 0.16%                            | 0.57%                            | <b>&lt;0.001</b> |
| Vascular Access Complication | 1.46%                       | 1.05%                            | 1.32%                            | 1.41%                            | 2.37%                            | <b>0.013</b>     |
| Bleeding                     | 1.16%                       | 0.60%                            | 0.91%                            | 1.02%                            | 2.22%                            | <b>&lt;0.001</b> |
| Contrast Induced Nephropathy | 0.72%                       | 0.52%                            | 0.90%                            | 0.80%                            | 0.66%                            | 0.396            |

|                 |       |       |       |       |       |                  |
|-----------------|-------|-------|-------|-------|-------|------------------|
| 30 days MACCE ‡ | 2.04% | 1.08% | 1.65% | 1.89% | 3.70% | <b>&lt;0.001</b> |
|-----------------|-------|-------|-------|-------|-------|------------------|

\* Major complications are composite of in-hospital MACCE and pericardial tamponade requiring pericardiocentesis or surgical evacuation.

† Pericardial tamponade requiring either pericardiocentesis or surgical evacuation.

‡ Composite of all-cause death, myocardial infarction, stroke, target vessel-, and lesion revascularization in 30 days post-PCI.

MACCE, major adverse cardiac and cerebrovascular event; MI, myocardial infarction; TLR, target lesion revascularization; TVR, target vessel revascularization.



**Supplementary Table 5.** In-hospital and short-term complications categorized according to chronic occlusive percutaneous coronary intervention (CTO PCI) fluoroscopy time length quartiles.

| Variable                     | Overall<br>(n=2720) | 1st Quartile<br>(n=698) | 2nd Quartile<br>(n=673) | 3rd Quartile<br>(n=669) | 4th Quartile<br>(n=680) | P value          |
|------------------------------|---------------------|-------------------------|-------------------------|-------------------------|-------------------------|------------------|
| Procedural success           | 88.5%               | 91.3%                   | 93.5%                   | 87.4%                   | 81.9%                   | <b>&lt;0.001</b> |
| Technical success            | 89.7%               | 91.7%                   | 94.2%                   | 88.6%                   | 84.4%                   | <b>&lt;0.001</b> |
| Major complications *        | 2.10%               | 1.86%                   | 1.78%                   | 1.94%                   | 2.79%                   | <b>&lt;0.001</b> |
| In-hospital MACCE            | 1.36%               | 1.86%                   | 1.19%                   | 1.05%                   | 1.32%                   | 0.581            |
| • Death                      | 0.29%               | 0.14%                   | 0.30%                   | 0.15%                   | 0.59%                   | 0.388            |
| • MI                         | 0.22%               | 0.29%                   | 0.15%                   | 0.15%                   | 0.29%                   | 0.893            |
| • Stroke                     | 0.22%               | 0.14%                   | 0.15%                   | 0.15%                   | 0.44%                   | 0.571            |
| • TVR                        | 0.99%               | 1.43%                   | 0.89%                   | 0.90%                   | 0.74%                   | 0.580            |
| • TLR                        | 0.92%               | 1.43%                   | 0.74%                   | 0.75%                   | 0.74%                   | 0.437            |
| Perforation                  | 2.40%               | 1.00%                   | 1.04%                   | 2.71%                   | 4.87%                   | <b>&lt;0.001</b> |
| Pericardial Tamponade †      | 0.74%               | 0.00%                   | 0.59%                   | 0.90%                   | 1.47%                   | <b>0.014</b>     |
| Vascular Access Complication | 2.05%               | 1.49%                   | 1.58%                   | 3.21%                   | 3.27%                   | 0.177            |
| Bleeding                     | 2.48%               | 0.72%                   | 1.51%                   | 2.01%                   | 6.07%                   | <b>&lt;0.001</b> |
| Contrast Induced Nephropathy | 0.40%               | 0.57%                   | 0.30%                   | 0.30%                   | 0.44%                   | 0.827            |
| 30 days MACCE ‡              | 2.13%               | 2.01%                   | 1.93%                   | 2.54%                   | 2.06%                   | 0.865            |

\* Major complications are composite of in-hospital MACCE and pericardial tamponade requiring pericardiocentesis or surgical evacuation.

† Pericardial tamponade requiring either pericardiocentesis or surgical evacuation.

‡ Composite of all-cause death, myocardial infarction, stroke, target vessel-, and lesion revascularization.

MACCE, major adverse cardiac and cerebrovascular event; MI, myocardial infarction; TLR, target lesion revascularization; TVR, target vessel revascularization.
